# Supplementary material for: Morphology-controlled MoS2 by low-temperature atomic layer deposition
Source: Royal Society of Chemistry journal article supplement (doi:10.1039/d0nr03863f), 2020-01-01
Supplement: d0nr03863f1.pdf [file d0nr03863f1.pdf]

## Morphology-Controlled MoS<sub>2</sub> by Low-Temperature Atomic Layer Deposition

Chengxu Shen,<sup>†</sup> Muhammad Hamid Raza,<sup>†</sup> Patrick Amsalem,<sup>‡</sup> Thorsten Schultz,<sup>‡,#</sup>  
Norbert Koch,<sup>‡,#</sup> and Nicola Pinna<sup>\*†</sup>

<sup>†</sup>Institut für Chemie and IRIS Adlershof, Humboldt-Universität zu Berlin, Brook-Taylor-Str. 2, 12489 Berlin, Germany

<sup>‡</sup>Institut für Physik and IRIS Adlershof, Humboldt-Universität zu Berlin, Brook-Taylor-Str. 6, 12489 Berlin, Germany

<sup>#</sup>Helmholtz-Zentrum für Materialien und Energie GmbH, Hahn-Meitner-Platz 1, 14109 Berlin, Germany

Corresponding Author E-mail: nicola.pinna@hu-berlin.de

### Electrochemical Measurements

Electrochemical measurements were performed using a Bio-Logic VMP3 electrochemical workstation equipped with a three-electrode system and a 3 mm diameter glassy carbon rotating disc electrode (RDE). RE-1B (Ag/AgCl, 3M KCl) and a Pt wire were employed as reference electrode and counter electrode, respectively. The glassy carbon (GC) working electrode with a surface area of 7.069 mm<sup>2</sup> was rotated under a rotating speed of 1600 rpm. The catalyst inks were prepared by dispersing 2 mg sample of MoS<sub>2</sub>/CNTs component and 16 μL Nafion (5 wt %, Sigma-Aldrich) in 384 μL of water/ethanol mixture (1:1 volume ratio) with 30 min sonication. Then, 3 μL catalyst ink was dropped on a GC electrode and dried at room temperature. The mass loading of MoS<sub>2</sub>/CNTs on the GC electrode for the electrochemical catalytic reaction is 0.212 mg/cm<sup>2</sup>. The electrochemical measurements were evaluated in 0.5 M H<sub>2</sub>SO<sub>4</sub> at 25 °C and linear sweep voltammetry (LSV) curves were measured in the potential window -0.6 to 0 V (vs. RHE) with a scan rate of 5 mV/s.

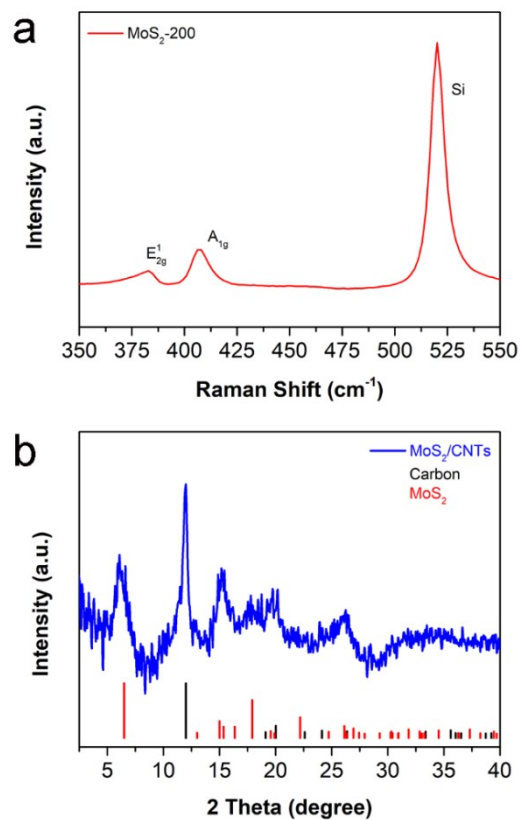

**Fig. S1.** (a) Raman spectrum of MoS<sub>2</sub>-200 (MoS<sub>2</sub> deposited on Si wafer at 200 °C). (b) XRD of MoS<sub>2</sub>/CNTs deposited at 200 °C with 500 ALD cycles.

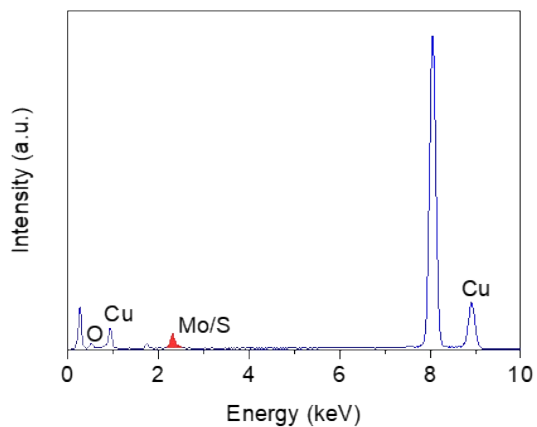

**Fig. S2.** EDX spectra for the MoS<sub>2</sub>/CNTs-200 sample.

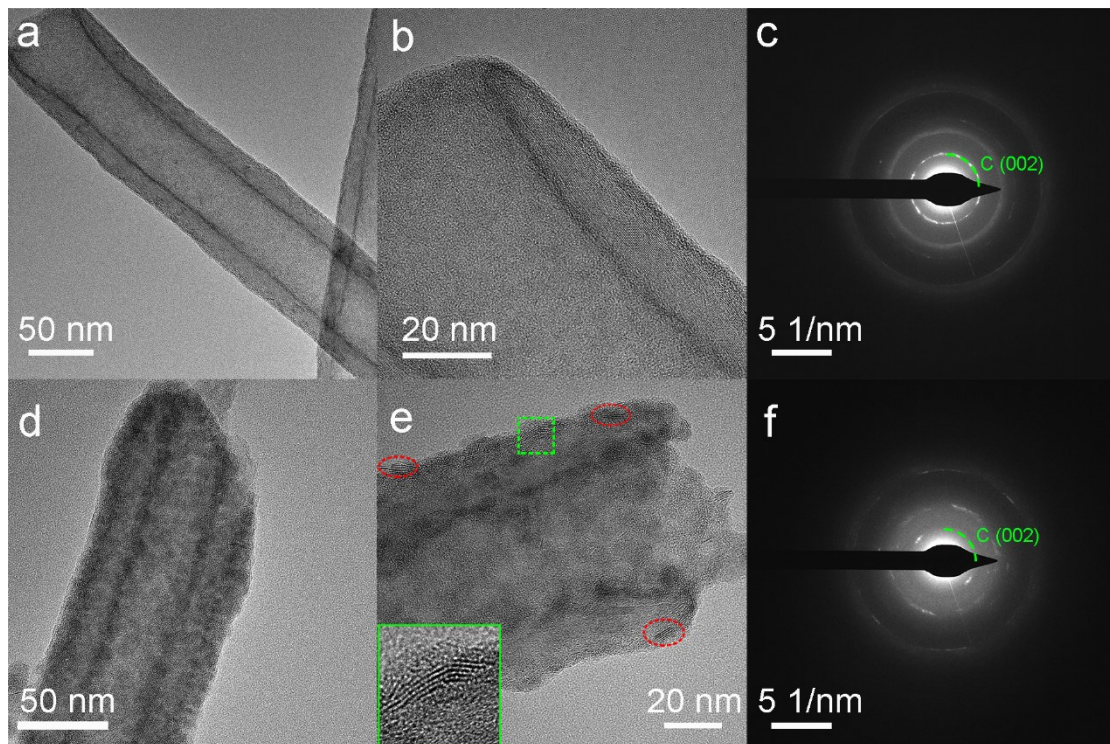

**Fig. S3.** TEM images of as-deposited MoS<sub>2</sub>/CNT samples at 200 °C (a-b) and 250 °C (c-d).

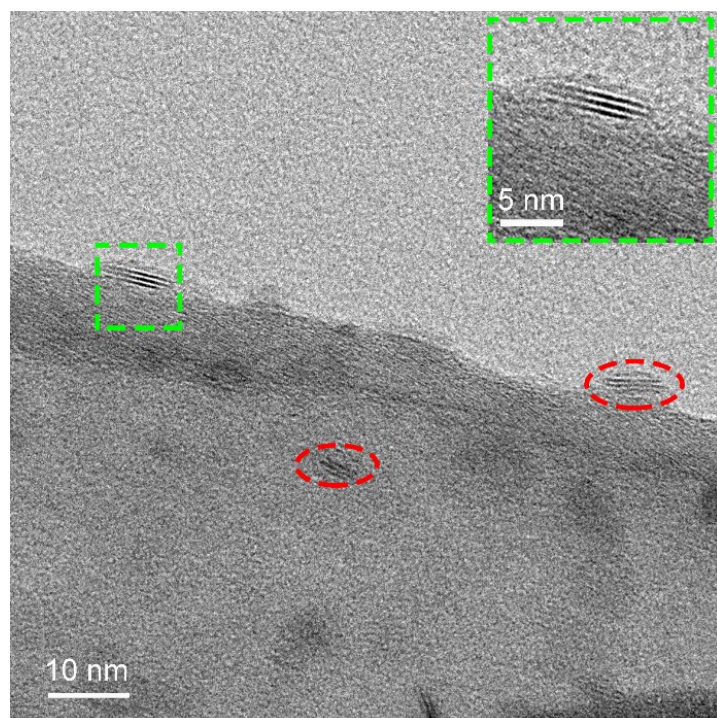

**Fig. S4.** High-resolution TEM image for MoS<sub>2</sub>/CNT deposited at 300 °C without post-annealing.

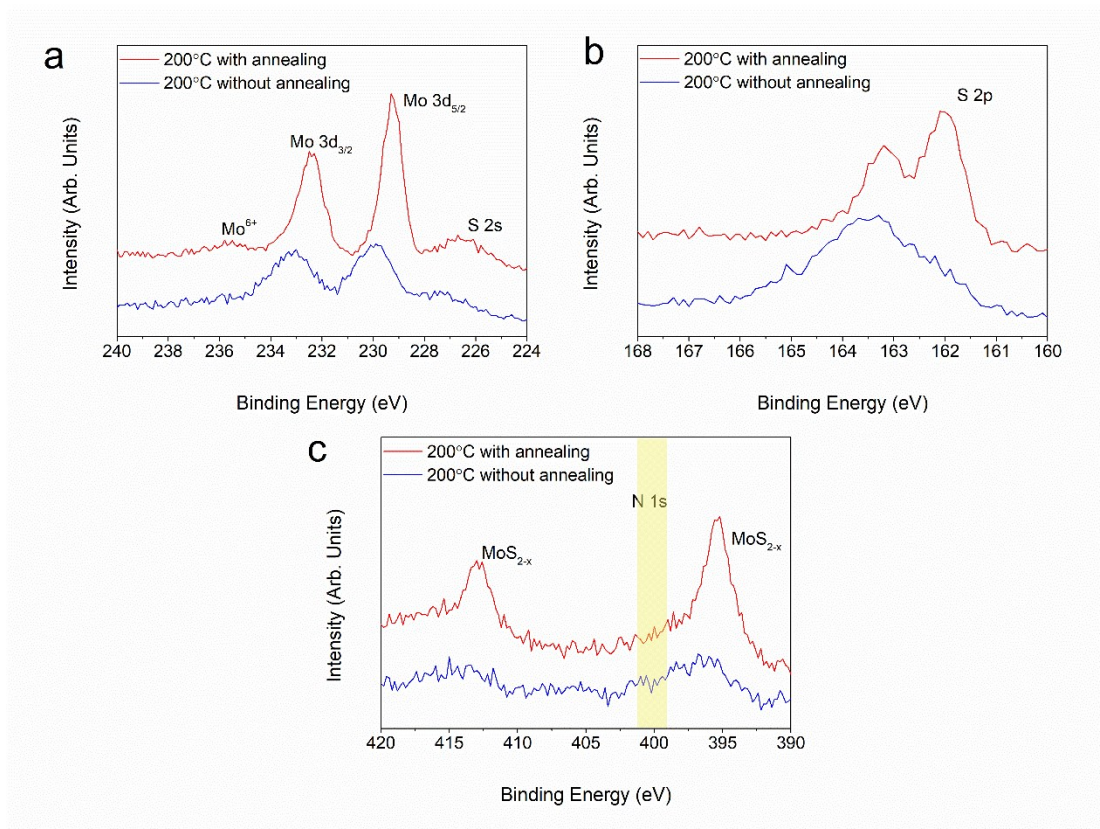

**Fig. S5.** XPS of Mo 3d (a), S 2p (b) and N 1s and Mo 3p (c) of MoS<sub>2</sub> deposited at 200 °C with (sample of MoS<sub>2</sub>/CNTs-200) and without post-annealing.

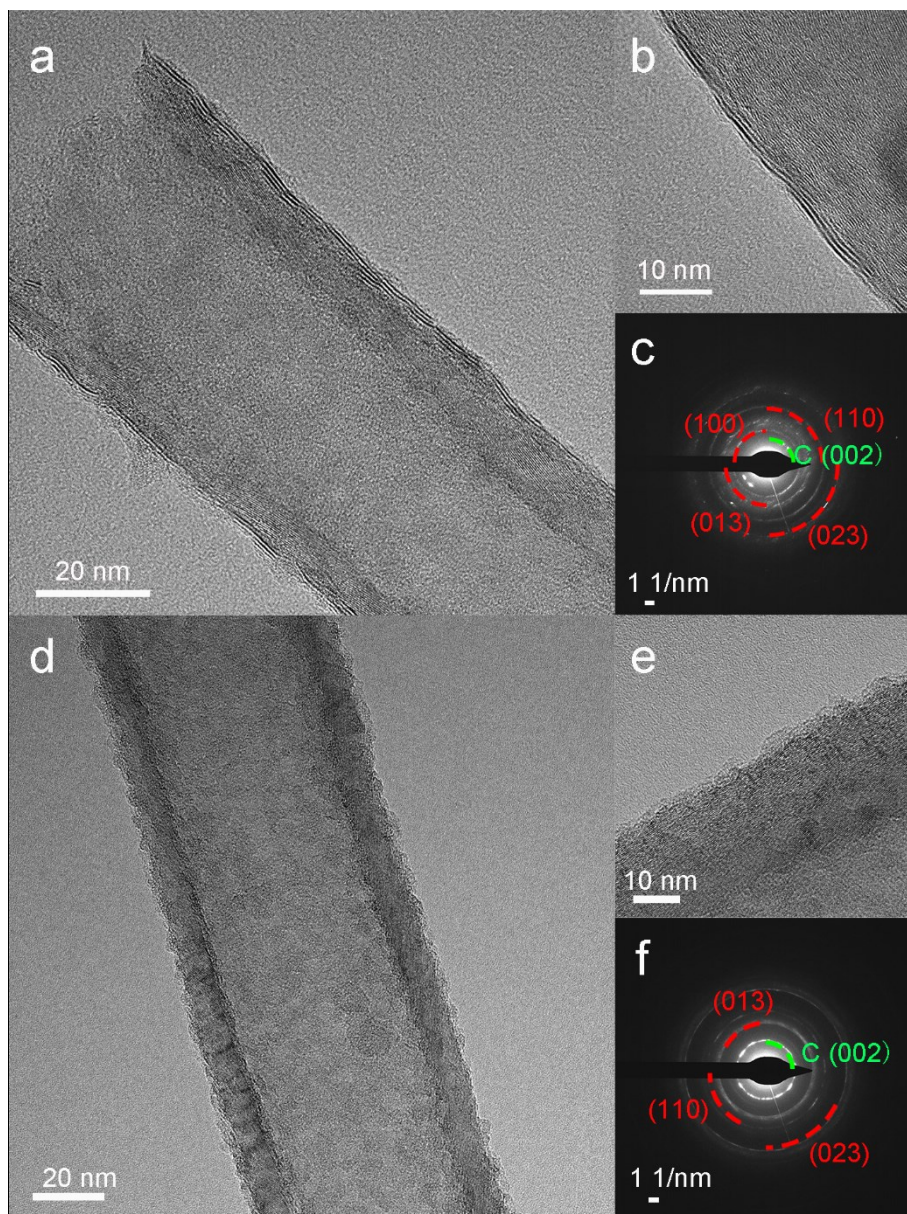

**Fig. S6.** TEM images of MoS<sub>2</sub> deposited on CNTs at 200 °C with 200 ALD cycles and annealed at 700 °C under Ar flow (a-c) and under forming gas (d-f) for 2h.

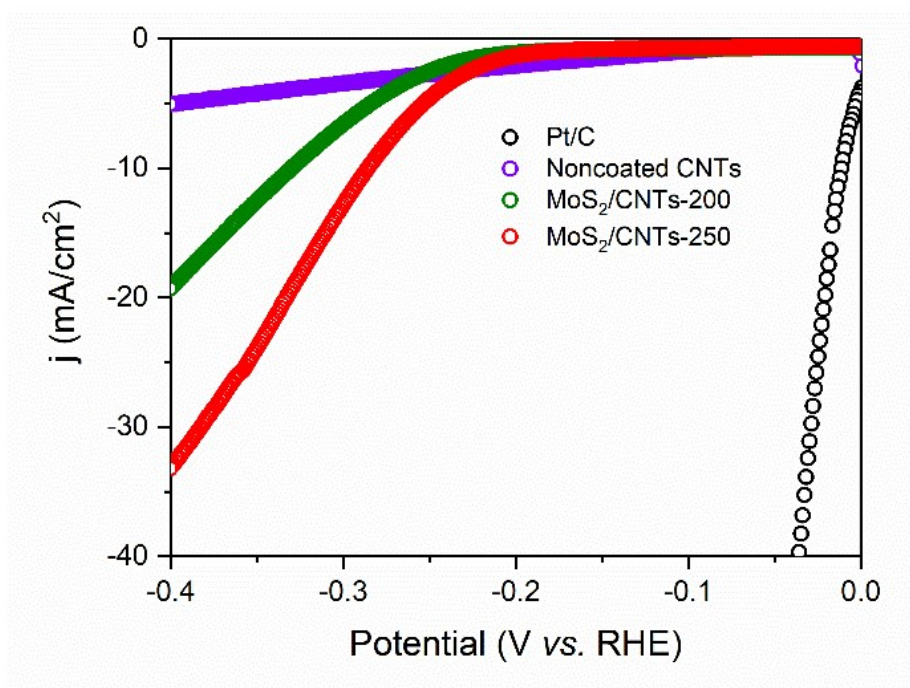

**Fig. S7.** HER performance of  $\text{MoS}_2/\text{CNTs-200}$  and  $\text{MoS}_2/\text{CNTs-250}$ .
